# Supplementary material for: Intrinsically disordered regions have specific functions in mitochondrial and nuclear proteins
Source: Royal Society of Chemistry journal article supplement (doi:10.1039/c1mb05208j), 2011-08-24
Supplement: c1mb05208j_2.pdf [file c1mb05208j_2.pdf]

Table S1. Number, average charge, and SEM in charge of entire proteins in each classification

| Classification        | All species       |         |         |        |         |        | <i>H. sapiens</i>    |         |         |        |         |        | <i>D. melanogaster</i> |         |         |        |         |        |
|-----------------------|-------------------|---------|---------|--------|---------|--------|----------------------|---------|---------|--------|---------|--------|------------------------|---------|---------|--------|---------|--------|
|                       | N-term            |         | IDRs    |        | SDs     |        | N-term               |         | IDRs    |        | SDs     |        | N-term                 |         | IDRs    |        | SDs     |        |
|                       | Number            | avg     | Avg     | SEM    | Avg     | SEM    | Number               | avg     | Avg     | SEM    | Avg     | SEM    | Number                 | avg     | Avg     | SEM    | Avg     | SEM    |
| All                   | 20282             | 0.0047  | 0.0020  | 0.0007 | 0.0073  | 0.0003 | 8464                 | 0.0021  | 0.0032  | 0.0009 | 0.0079  | 0.0005 | 1415                   | 0.0065  | 0.0041  | 0.0025 | 0.0112  | 0.0012 |
| Nucleus               | 5212              | -0.0040 | -0.0150 | 0.0013 | 0.0246  | 0.0008 | 1928                 | -0.0108 | -0.0114 | 0.0020 | 0.0323  | 0.0013 | 434                    | -0.0044 | -0.0170 | 0.0043 | 0.0300  | 0.0027 |
| DNA-binding           | 1255              | 0.0016  | -0.0262 | 0.0016 | 0.0607  | 0.0017 | 450                  | -0.0108 | -0.0231 | 0.0027 | 0.0737  | 0.0031 | 116                    | -0.0105 | -0.0241 | 0.0034 | 0.0728  | 0.0057 |
| Non-DNA-binding       | 3957              | -0.0058 | -0.0114 | 0.0016 | 0.0132  | 0.0008 | 1478                 | -0.0108 | -0.0078 | 0.0024 | 0.0197  | 0.0012 | 318                    | -0.0022 | -0.0144 | 0.0057 | 0.0144  | 0.0026 |
| Nucleus and cytoplasm | 1817              | -0.0091 | -0.0256 | 0.0023 | -0.0035 | 0.0010 | 660                  | -0.0085 | -0.0232 | 0.0033 | -0.0011 | 0.0015 | 84                     | -0.0115 | -0.0222 | 0.0118 | 0.0050  | 0.0055 |
| Cytoplasm             | 3221              | -0.0035 | -0.0079 | 0.0018 | -0.0057 | 0.0007 | 1345                 | -0.0059 | -0.0115 | 0.0023 | -0.0094 | 0.0009 | 192                    | -0.0102 | -0.0031 | 0.0080 | -0.0066 | 0.0025 |
| Plasma membrane       | 5430              | 0.0029  | 0.0073  | 0.0011 | 0.0030  | 0.0004 | 2679                 | 0.0017  | 0.0089  | 0.0015 | 0.0018  | 0.0005 | 321                    | 0.0102  | 0.0152  | 0.0044 | 0.0051  | 0.0014 |
| ER/Golgi              | 1543              | 0.0082  | 0.0154  | 0.0023 | 0.0032  | 0.0010 | 883                  | 0.0125  | 0.0159  | 0.0032 | 0.0071  | 0.0013 | 130                    | -0.0057 | 0.0002  | 0.0067 | 0.0044  | 0.0037 |
| Secreted              | 1389              | 0.0129  | 0.0128  | 0.0027 | 0.0014  | 0.0008 | 506                  | 0.0167  | 0.0210  | 0.0041 | 0.0038  | 0.0012 | 136                    | 0.0301  | 0.0276  | 0.0095 | 0.0019  | 0.0018 |
| Mitochondria          | 1677              | 0.0591  | 0.0645  | 0.0022 | 0.0127  | 0.0011 | 464                  | 0.0578  | 0.0678  | 0.0040 | 0.0113  | 0.0020 | 119                    | 0.0601  | 0.0587  | 0.0074 | 0.0105  | 0.0039 |
|                       |                   |         |         |        |         |        |                      |         |         |        |         |        |                        |         |         |        |         |        |
| Classification        | <i>C. elegans</i> |         |         |        |         |        | <i>A. thaliana</i>   |         |         |        |         |        | <i>O. sativa</i>       |         |         |        |         |        |
|                       | N-term            |         | IDRs    |        | SDs     |        | N-term               |         | IDRs    |        | SDs     |        | N-term                 |         | IDRs    |        | SDs     |        |
|                       | Number            | avg     | Avg     | SEM    | Avg     | SEM    | Number               | avg     | Avg     | SEM    | Avg     | SEM    | Number                 | avg     | Avg     | SEM    | Avg     | SEM    |
| All                   | 1344              | 0.0040  | 0.0015  | 0.0026 | 0.0070  | 0.0010 | 2697                 | 0.0076  | 0.0041  | 0.0018 | 0.0115  | 0.0009 | 527                    | 0.0063  | 0.0026  | 0.0044 | 0.0079  | 0.0018 |
| Nucleus               | 388               | 0.0063  | -0.0137 | 0.0053 | 0.0173  | 0.0025 | 816                  | -0.0002 | -0.0253 | 0.0029 | 0.0391  | 0.0021 | 175                    | 0.0061  | -0.0016 | 0.0065 | 0.0267  | 0.0039 |
| DNA-binding           | 141               | 0.0275  | -0.0258 | 0.0043 | 0.0444  | 0.0036 | 362                  | -0.0050 | -0.0400 | 0.0024 | 0.0649  | 0.0028 | 31                     | -0.0035 | -0.0250 | 0.0064 | 0.0193  | 0.0090 |
| Non-DNA-binding       | 247               | -0.0053 | -0.0068 | 0.0078 | 0.0018  | 0.0029 | 454                  | 0.0034  | -0.0136 | 0.0047 | 0.0186  | 0.0028 | 144                    | 0.0082  | 0.0035  | 0.0077 | 0.0283  | 0.0043 |
| Nucleus and cytoplasm | 43                | -0.0168 | -0.0421 | 0.0198 | -0.0041 | 0.0051 | 86                   | -0.0063 | -0.0360 | 0.0092 | 0.0063  | 0.0054 | 19                     | -0.0130 | -0.0919 | 0.0205 | -0.0154 | 0.0069 |
| Cytoplasm             | 184               | -0.0094 | -0.0031 | 0.0073 | -0.0047 | 0.0024 | 297                  | -0.0038 | -0.0097 | 0.0077 | -0.0024 | 0.0025 | 80                     | -0.0057 | 0.0136  | 0.0165 | -0.0056 | 0.0044 |
| Plasma membrane       | 428               | 0.0010  | 0.0038  | 0.0039 | 0.0079  | 0.0012 | 928                  | 0.0100  | 0.0167  | 0.0029 | -0.0001 | 0.0009 | 131                    | 0.0094  | 0.0085  | 0.0072 | 0.0012  | 0.0023 |
| ER/Golgi              | 107               | 0.0038  | 0.0138  | 0.0068 | -0.0040 | 0.0039 | 262                  | 0.0083  | 0.0337  | 0.0054 | 0.0027  | 0.0015 | 96                     | 0.0054  | 0.0024  | 0.0083 | 0.0006  | 0.0029 |
| Secreted              | 69                | 0.0035  | -0.0132 | 0.0128 | -0.0040 | 0.0030 | 130                  | 0.0182  | 0.0156  | 0.0088 | 0.0022  | 0.0023 | 10                     | 0.0418  | -0.0197 | 0.0378 | -0.0066 | 0.0090 |
| Mitochondria          | 126               | 0.0399  | 0.0592  | 0.0066 | 0.0084  | 0.0034 | 179                  | 0.0524  | 0.0635  | 0.0050 | -0.0087 | 0.0028 | 17                     | 0.0625  | 0.0677  | 0.0209 | 0.0034  | 0.0077 |
|                       |                   |         |         |        |         |        |                      |         |         |        |         |        |                        |         |         |        |         |        |
| Classification        | <i>S. pombe</i>   |         |         |        |         |        | <i>S. cerevisiae</i> |         |         |        |         |        |                        |         |         |        |         |        |
|                       | N-term            |         | IDRs    |        | SDs     |        | N-term               |         |         |        |         |        |                        |         |         |        |         |        |
|                       | Number            | avg     | Avg     | SEM    | Avg     | SEM    | Number               | avg     | Avg     | SEM    | Avg     | SEM    |                        |         |         |        |         |        |
| All                   | 2329              | 0.0053  | -0.0007 | 0.0020 | 0.0017  | 0.0009 | 3506                 | 0.0078  | -0.0018 | 0.0018 | 0.0048  | 0.0008 |                        |         |         |        |         |        |
| Nucleus               | 588               | -0.0015 | -0.0117 | 0.0041 | 0.0036  | 0.0018 | 883                  | -0.0009 | -0.0176 | 0.0033 | 0.0086  | 0.0015 |                        |         |         |        |         |        |
| DNA-binding           | 46                | 0.0274  | -0.0006 | 0.0105 | 0.0301  | 0.0070 | 109                  | 0.0446  | -0.0067 | 0.0086 | 0.0264  | 0.0048 |                        |         |         |        |         |        |
| Non-DNA-binding       | 542               | -0.0039 | -0.0126 | 0.0044 | 0.0014  | 0.0018 | 774                  | -0.0070 | -0.0191 | 0.0036 | 0.0061  | 0.0016 |                        |         |         |        |         |        |
| Nucleus and cytoplasm | 458               | -0.0091 | -0.0268 | 0.0043 | -0.0097 | 0.0021 | 467                  | -0.0090 | -0.0221 | 0.0055 | -0.0036 | 0.0021 |                        |         |         |        |         |        |
| Cytoplasm             | 448               | -0.0027 | -0.0042 | 0.0043 | -0.0058 | 0.0017 | 675                  | 0.0046  | -0.0075 | 0.0044 | 0.0004  | 0.0021 |                        |         |         |        |         |        |
| Plasma membrane       | 300               | -0.0076 | -0.0081 | 0.0047 | 0.0083  | 0.0019 | 643                  | -0.0008 | -0.0077 | 0.0035 | 0.0066  | 0.0014 |                        |         |         |        |         |        |
| ER/Golgi              | 20                | 0.0000  | -0.0115 | 0.0226 | -0.0302 | 0.0064 | 45                   | -0.0176 | -0.0126 | 0.0110 | -0.0375 | 0.0066 |                        |         |         |        |         |        |
| Secreted              | 223               | 0.0095  | 0.0134  | 0.0070 | 0.0005  | 0.0022 | 315                  | -0.0001 | -0.0015 | 0.0056 | -0.0009 | 0.0019 |                        |         |         |        |         |        |
| Mitochondria          | 293               | 0.0658  | 0.0655  | 0.0052 | 0.0235  | 0.0028 | 479                  | 0.0633  | 0.0639  | 0.0046 | 0.0175  | 0.0023 |                        |         |         |        |         |        |

Table S2. Number, average charge, and SEM in charge of mature proteins in each classification

| Classification        | All species       |         |         |        |         |        | <i>H. sapiens</i>    |         |         |        |         |        | <i>D. melanogaster</i> |         |         |        |         |        |
|-----------------------|-------------------|---------|---------|--------|---------|--------|----------------------|---------|---------|--------|---------|--------|------------------------|---------|---------|--------|---------|--------|
|                       | N-term            |         | IDRs    |        | SDs     |        | N-term               |         | IDRs    |        | SDs     |        | N-term                 |         | IDRs    |        | SDs     |        |
|                       | Number            | avg     | Avg     | SEM    | Avg     | SEM    | Number               | avg     | Avg     | SEM    | Avg     | SEM    | Number                 | avg     | Avg     | SEM    | Avg     | SEM    |
| All                   | 19211             | -0.0014 | -0.0045 | 0.0007 | 0.0070  | 0.0003 | 8076                 | -0.0040 | -0.0024 | 0.0010 | 0.0074  | 0.0005 | 1301                   | 0.0007  | -0.0009 | 0.0027 | 0.0113  | 0.0012 |
| Nucleus               | 5201              | -0.0043 | -0.0151 | 0.0013 | 0.0247  | 0.0008 | 1922                 | -0.0112 | -0.0115 | 0.0020 | 0.0325  | 0.0013 | 431                    | -0.0045 | -0.0172 | 0.0043 | 0.0302  | 0.0027 |
| DNA-binding           | 1255              | 0.0015  | -0.0261 | 0.0016 | 0.0607  | 0.0017 | 450                  | -0.0109 | -0.0231 | 0.0027 | 0.0737  | 0.0031 | 116                    | -0.0104 | -0.0241 | 0.0034 | 0.0728  | 0.0057 |
| Non-DNA-binding       | 3946              | -0.0060 | -0.0116 | 0.0016 | 0.0132  | 0.0008 | 1472                 | -0.0113 | -0.0080 | 0.0024 | 0.0199  | 0.0012 | 315                    | -0.0023 | -0.0146 | 0.0058 | 0.0146  | 0.0026 |
| Nucleus and cytoplasm | 1797              | -0.0091 | -0.0264 | 0.0024 | -0.0036 | 0.0010 | 653                  | -0.0085 | -0.0241 | 0.0034 | -0.0012 | 0.0015 | 83                     | -0.0115 | -0.0221 | 0.0120 | 0.0051  | 0.0056 |
| Cytoplasm             | 3189              | -0.0042 | -0.0086 | 0.0018 | -0.0060 | 0.0007 | 1328                 | -0.0067 | -0.0125 | 0.0024 | -0.0098 | 0.0009 | 191                    | -0.0108 | -0.0022 | 0.0084 | -0.0071 | 0.0024 |
| Plasma membrane       | 5332              | -0.0031 | 0.0041  | 0.0012 | 0.0026  | 0.0004 | 2645                 | -0.0052 | 0.0061  | 0.0015 | 0.0013  | 0.0006 | 316                    | 0.0044  | 0.0141  | 0.0045 | 0.0054  | 0.0014 |
| ER/Golgi              | 1371              | -0.0023 | 0.0091  | 0.0029 | 0.0011  | 0.0008 | 493                  | 0.0029  | 0.0169  | 0.0044 | 0.0036  | 0.0012 | 135                    | -0.0114 | 0.0261  | 0.0097 | 0.0018  | 0.0019 |
| Secreted              | 1177              | 0.0094  | 0.0017  | 0.0033 | -0.0010 | 0.0012 | 699                  | 0.0135  | 0.0025  | 0.0045 | 0.0033  | 0.0017 | 82                     | 0.0280  | -0.0085 | 0.0103 | -0.0011 | 0.0053 |
| Mitochondria          | 1151              | 0.0244  | 0.0263  | 0.0030 | 0.0153  | 0.0013 | 337                  | 0.0164  | 0.0263  | 0.0057 | 0.0111  | 0.0021 | 64                     | 0.0237  | 0.0190  | 0.0116 | 0.0112  | 0.0042 |
|                       |                   |         |         |        |         |        |                      |         |         |        |         |        |                        |         |         |        |         |        |
| Classification        | <i>C. elegans</i> |         |         |        |         |        | <i>A. thaliana</i>   |         |         |        |         |        | <i>O. sativa</i>       |         |         |        |         |        |
|                       | N-term            |         | IDRs    |        | SDs     |        | N-term               |         | IDRs    |        | SDs     |        | N-term                 |         | IDRs    |        | SDs     |        |
|                       | Number            | avg     | Avg     | SEM    | Avg     | SEM    | Number               | avg     | Avg     | SEM    | Avg     | SEM    | Number                 | avg     | Avg     | SEM    | Avg     | SEM    |
| All                   | 1256              | -0.0008 | -0.0051 | 0.0027 | 0.0071  | 0.0011 | 2518                 | 0.0003  | -0.0046 | 0.0020 | 0.0121  | 0.0010 | 492                    | -0.0001 | -0.0054 | 0.0047 | 0.0084  | 0.0019 |
| Nucleus               | 388               | 0.0063  | -0.0135 | 0.0053 | 0.0173  | 0.0025 | 816                  | -0.0002 | -0.0252 | 0.0029 | 0.0391  | 0.0021 | 175                    | 0.0061  | -0.0016 | 0.0065 | 0.0267  | 0.0039 |
| DNA-binding           | 141               | 0.0275  | -0.0258 | 0.0043 | 0.0444  | 0.0036 | 362                  | -0.0050 | -0.0400 | 0.0024 | 0.0649  | 0.0028 | 31                     | -0.0035 | -0.0250 | 0.0064 | 0.0193  | 0.0090 |
| Non-DNA-binding       | 247               | -0.0053 | -0.0065 | 0.0079 | 0.0018  | 0.0029 | 454                  | 0.0036  | -0.0135 | 0.0047 | 0.0186  | 0.0028 | 144                    | 0.0082  | 0.0035  | 0.0077 | 0.0283  | 0.0043 |
| Nucleus and cytoplasm | 43                | -0.0168 | -0.0421 | 0.0198 | -0.0041 | 0.0051 | 86                   | -0.0050 | -0.0418 | 0.0102 | 0.0063  | 0.0054 | 19                     | -0.0130 | -0.0919 | 0.0205 | -0.0154 | 0.0069 |
| Cytoplasm             | 183               | -0.0097 | -0.0031 | 0.0076 | -0.0046 | 0.0024 | 294                  | -0.0045 | -0.0097 | 0.0080 | -0.0024 | 0.0025 | 79                     | -0.0064 | 0.0136  | 0.0170 | -0.0044 | 0.0042 |
| Plasma membrane       | 423               | -0.0030 | 0.0012  | 0.0039 | 0.0079  | 0.0013 | 886                  | 0.0024  | 0.0092  | 0.0032 | -0.0009 | 0.0009 | 122                    | -0.0017 | 0.0040  | 0.0080 | 0.0003  | 0.0024 |
| ER/Golgi              | 69                | -0.0044 | -0.0212 | 0.0144 | -0.0042 | 0.0030 | 129                  | -0.0054 | 0.0129  | 0.0095 | 0.0015  | 0.0024 | 10                     | -0.0050 | -0.0268 | 0.0435 | -0.0070 | 0.0093 |
| Secreted              | 86                | -0.0007 | 0.0069  | 0.0082 | -0.0099 | 0.0037 | 179                  | 0.0140  | 0.0226  | 0.0083 | 0.0005  | 0.0018 | 77                     | 0.0398  | -0.0249 | 0.0110 | -0.0006 | 0.0035 |
| Mitochondria          | 65                | 0.0174  | 0.0243  | 0.0104 | 0.0163  | 0.0054 | 129                  | 0.0039  | 0.0132  | 0.0075 | -0.0051 | 0.0033 | 11                     | 0.0032  | -0.0031 | 0.0216 | 0.0160  | 0.0098 |
|                       |                   |         |         |        |         |        |                      |         |         |        |         |        |                        |         |         |        |         |        |
| Classification        | <i>S. pombe</i>   |         |         |        |         |        | <i>S. cerevisiae</i> |         |         |        |         |        |                        |         |         |        |         |        |
|                       | N-term            |         | IDRs    |        | SDs     |        | N-term               |         |         |        | SDs     |        |                        |         |         |        |         |        |
|                       | Number            | avg     | Avg     | SEM    | Avg     | SEM    | Number               | avg     | Avg     | SEM    | Avg     | SEM    |                        |         |         |        |         |        |
| All                   | 2204              | -0.0003 | -0.0072 | 0.0021 | 0.0008  | 0.0009 | 3364                 | 0.0017  | -0.0089 | 0.0019 | 0.0044  | 0.0008 |                        |         |         |        |         |        |
| Nucleus               | 588               | -0.0016 | -0.0120 | 0.0041 | 0.0036  | 0.0018 | 881                  | -0.0013 | -0.0178 | 0.0034 | 0.0086  | 0.0015 |                        |         |         |        |         |        |
| DNA-binding           | 46                | 0.0274  | -0.0002 | 0.0108 | 0.0301  | 0.0070 | 109                  | 0.0438  | -0.0065 | 0.0087 | 0.0264  | 0.0048 |                        |         |         |        |         |        |
| Non-DNA-binding       | 542               | -0.0039 | -0.0129 | 0.0044 | 0.0014  | 0.0018 | 772                  | -0.0074 | -0.0194 | 0.0036 | 0.0060  | 0.0016 |                        |         |         |        |         |        |
| Nucleus and cytoplasm | 454               | -0.0091 | -0.0274 | 0.0044 | -0.0097 | 0.0021 | 459                  | -0.0093 | -0.0225 | 0.0057 | -0.0038 | 0.0021 |                        |         |         |        |         |        |
| Cytoplasm             | 443               | -0.0033 | -0.0053 | 0.0043 | -0.0063 | 0.0016 | 671                  | 0.0040  | -0.0087 | 0.0045 | -0.0004 | 0.0021 |                        |         |         |        |         |        |
| Plasma membrane       | 300               | -0.0103 | -0.0092 | 0.0048 | 0.0079  | 0.0019 | 640                  | -0.0033 | -0.0080 | 0.0036 | 0.0063  | 0.0014 |                        |         |         |        |         |        |
| ER/Golgi              | 222               | -0.0141 | 0.0116  | 0.0073 | 0.0002  | 0.0022 | 313                  | -0.0445 | -0.0059 | 0.0060 | -0.0011 | 0.0020 |                        |         |         |        |         |        |
| Secreted              | 19                | 0.0047  | -0.0124 | 0.0239 | -0.0357 | 0.0061 | 35                   | -0.0035 | -0.0450 | 0.0131 | -0.0538 | 0.0059 |                        |         |         |        |         |        |
| Mitochondria          | 179               | 0.0439  | 0.0356  | 0.0073 | 0.0289  | 0.0035 | 366                  | 0.0329  | 0.0289  | 0.0057 | 0.0201  | 0.0026 |                        |         |         |        |         |        |
